# Supplementary material for: The role of the molecular weight of the adsorbed layer on a substrate in the suppressed dynamics of supported thin polystyrene films
Source: Royal Society of Chemistry journal article supplement (doi:10.1039/d2sm00067a), 2022-01-01
Supplement: d2sm00067a1.pdf [file d2sm00067a1.pdf]

## Supplementary information for

# The Role of the Molecular Weight of the Adsorbed Layer at a Substrate in the Suppressed Dynamics of Supported Thin Polystyrene Films

Weizhao Ren,<sup>a</sup> Xin Wang,<sup>a</sup> Jiahui Shi,<sup>a</sup> Jianquan Xu,<sup>\*a</sup> Hidenobu Taneda,<sup>b</sup> Norifumi L. Yamada,<sup>c</sup> Daisuke Kawaguchi,<sup>bd</sup> Keiji Tanaka,<sup>\*bd</sup> and Xinpeng Wang<sup>\*a</sup>

<sup>a</sup>Department of Chemistry, Key Laboratory of Surface & Interface Science of Polymer Materials of Zhejiang Province, Zhejiang Sci-Tech University, Hangzhou 310018, P. R. China

<sup>b</sup>Department of Applied Chemistry, Kyushu University, Fukuoka, 819-0395, Japan

<sup>c</sup>Neutron Science Laboratory, High Energy Accelerator Research Organization, 203-1 Shirakata, Tokai, Naka-gun, Ibaraki 319-1106, Japan

<sup>d</sup>Center for Polymer Interface and Molecular Adhesion Science, Kyushu University, Fukuoka, 819-0395, Japan

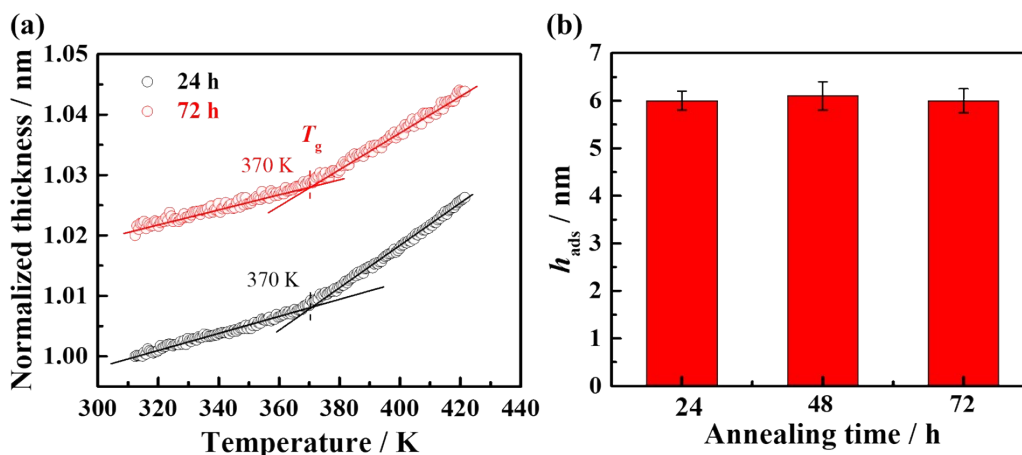

**Fig. S1** (a) Temperature dependence of normalized thickness for 60 nm thick PS films supported on the 6 nm adsorbed layer after annealing at 393 K for 24 h and 72 h, respectively. (b) The thickness of adsorbed layer ( $h_{\text{ads}}$ ) as a function of annealing time. (A 60 nm thick PS film was directly spun cast on top of the 6 nm adsorbed layer and then annealing at 393 K for 24 h, 48 h, 72 h, and followed by toluene leaching.)

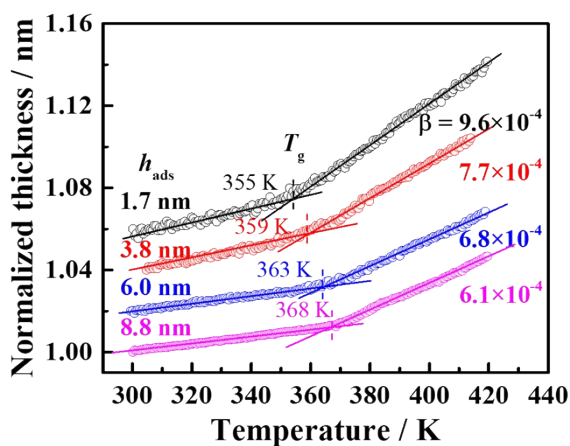

**Fig. S2** Representative temperature dependence of normalized thickness for PS films supported on adsorbed layer with various  $h_{\text{ads}}$ . The  $\beta$  value is thermal expansivity above  $T_g$ . 25 nm thick PS films are used here and the molecular weight of upper PS films and bottom adsorbed layer are both 222 kg/mol.

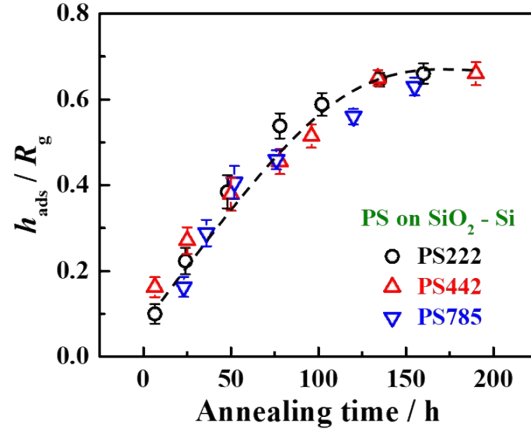

**Fig. S3** Growth of the adsorbed layer on SiO<sub>2</sub>-Si prepared by PS with different molecular weights against annealing time at 423 K. The dotted line corresponds to the best-fit of the power-law growth described in the text. The solid line is the best-fit for the linear the adsorption part. The initial thickness of the PS film for preparation of the adsorbed layer was larger than  $8 R_g$ .

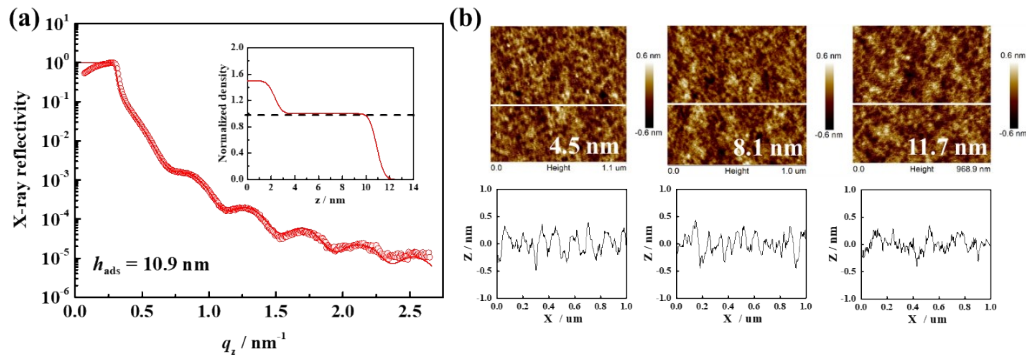

**Fig. S4** (a) XRR profile of the PS442 adsorbed layer with  $h_{\text{ads}}=10.9$  nm. Open circles denote the experimental data. The solid curve denotes the calculated reflectivity from a density profile shown in the inset. The dotted line in the inset corresponds to the value of bulk PS. (b) AFM height images of the PS adsorbed layer with various  $h_{\text{ads}}$ . The corresponding height profiles along the white line in part are plotted below each image.

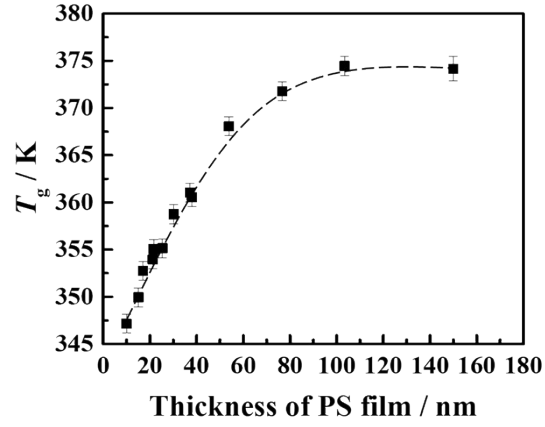

**Fig. S5**  $T_g$  for PS222 films supported on neat SiO<sub>2</sub>-Si substrate as a function of the film thickness.

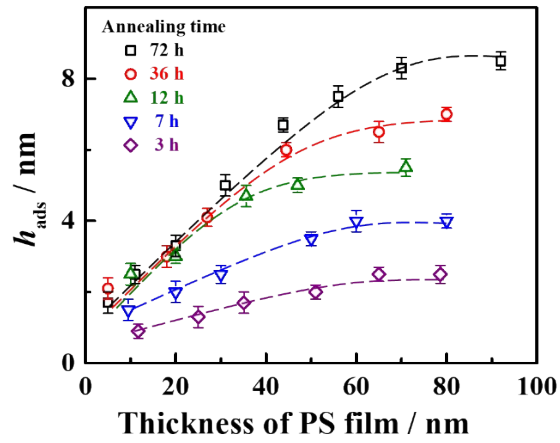

**Fig. S6** Thickness of PS222 adsorbed layer ( $h_{ads}$ ) on SiO<sub>2</sub>-Si substrate vs. thickness of PS films for preparation of adsorbed layer with annealing at 423 K.

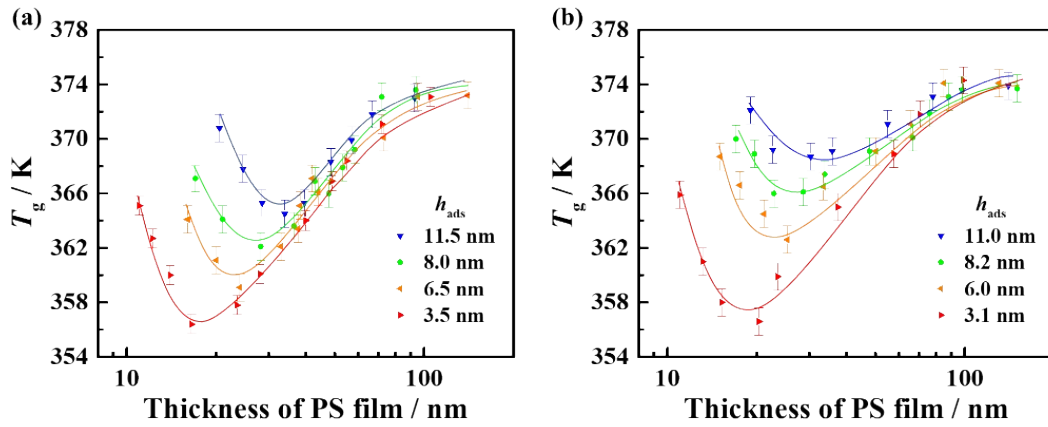

**Fig. S7**  $T_g$  for PS222 films supported on the adsorbed layer as a function of the film thickness.  $M_w$  of PS adsorbed layer was (a) 442 kg/mol, (b) 785 kg/mol.

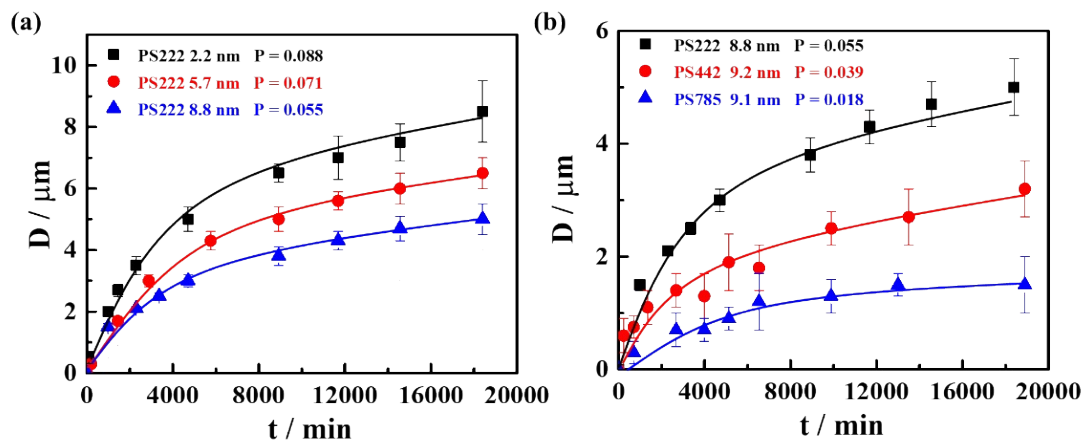

**Fig. S8** Time evolution of hole diameter ( $D$ ) for dewetting of a  $45 \pm 2$  nm thick PS40 film on various adsorbed layers. The data are fitted by the power law  $D = P t^{2/3}$ . (a) The  $M_w$  of adsorbed layer is 222 kg/mol. (b) Adsorbed layers of similar thickness with various  $M_w$ .

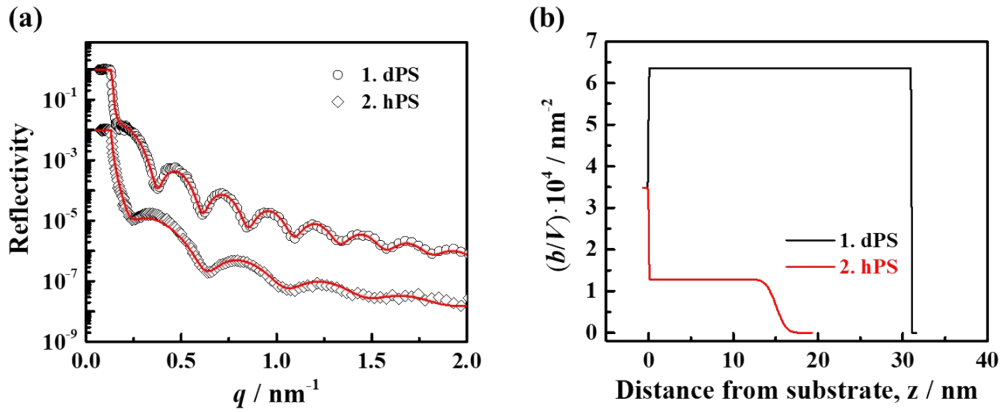

**Fig. S9** (a) NR profiles of a 31 nm-thick dPS film and a PS442 adsorbed layer with  $h_{\text{ads}}=12.9$  nm. Solid curves are the best-fits to the data based on model  $(b/V)$  profiles shown in (b). (b) Scattering length density profiles for dPS film supported on  $\text{SiO}_2$ -Si and hPS adsorbed layer on  $\text{SiO}_2$ -Si against the distance from the  $\text{SiO}_2$ -Si surface.

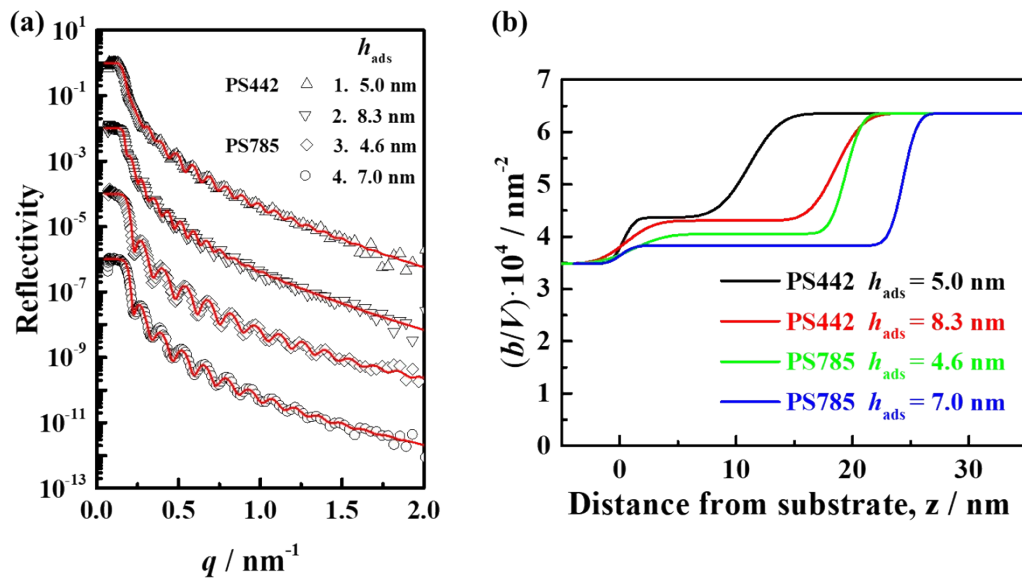

**Fig. S10** (a) NR profiles of dPS film supported on various hPS adsorbed layers after annealing at 393 K for 24 h. Solid curves are the best-fits to the data based on model  $(b/V)$  profiles shown in (b). (b)  $(b/V)$  profiles for these supported dPS films against the distance from the  $\text{SiO}_2$  surface after annealing at 393 K for 24 h.

**Table S1.** Structure parameters of dPS thin films retained on the hPS adsorbed layer after annealing at 393 K for 24 h (the molecular weight of the PS adsorbed layer was 222 kg/mol).

| Code | $h_{\text{ads}}$<br>(nm) | top layer         |                                           |                   | bottom layer      |                                           |                   | substrate         | overlap region |
|------|--------------------------|-------------------|-------------------------------------------|-------------------|-------------------|-------------------------------------------|-------------------|-------------------|----------------|
|      |                          | roughness<br>(nm) | $(b/V) \times 10^4$<br>(nm <sup>2</sup> ) | thickness<br>(nm) | roughness<br>(nm) | $(b/V) \times 10^4$<br>(nm <sup>2</sup> ) | thickness<br>(nm) | roughness<br>(nm) | $h^{OR}$ (nm)  |
| 1    | 3.1                      | 0.71              | 6.36                                      | 36.9              | 1.3               | 4.65                                      | 3.3               | 1.36              | 9.1            |
| 2    | 5.0                      | 0.58              | 6.36                                      | 36.6              | 2.9               | 4.05                                      | 5.9               | 0.48              | 13             |
| 3    | 6.8                      | 0.59              | 6.36                                      | 32.4              | 3.1               | 5.38                                      | 6.5               | 1.3               | 16.5           |
| 4    | 8.8                      | 0.55              | 6.36                                      | 34.9              | 5.5               | 4.56                                      | 9.2               | 1.6               | 21.2           |

**Table S2.** Structure parameters of dPS thin films supported on the hPS adsorbed layer after annealing at 393 K for 24 h (Code 1,2: the molecular weight of the PS adsorbed layer was 442 kg/mol and Code 3,4: the molecular weight of PS adsorbed layer was 785 kg/mol).

| Code | $h_{\text{ads}}$<br>(nm) | top layer         |                                           |                   | bottom layer      |                                           |                   | substrate         | overlap region |
|------|--------------------------|-------------------|-------------------------------------------|-------------------|-------------------|-------------------------------------------|-------------------|-------------------|----------------|
|      |                          | roughness<br>(nm) | $(b/V) \times 10^4$<br>(nm <sup>2</sup> ) | thickness<br>(nm) | roughness<br>(nm) | $(b/V) \times 10^4$<br>(nm <sup>2</sup> ) | thickness<br>(nm) | roughness<br>(nm) | $h^{OR}$ (nm)  |
| 1    | 5.0                      | 0.74              | 6.36                                      | 51.2              | 3.0               | 5.01                                      | 10.5              | 0.8               | 16.8           |
| 2    | 8.3                      | 0.70              | 6.36                                      | 72.7              | 1.81              | 4.31                                      | 18.1              | 1.9               | 23.5           |
| 3    | 4.6                      | 0.42              | 6.36                                      | 44.5              | 1.1               | 4.05                                      | 18.2              | 1.7               | 22.3           |
| 4    | 7.0                      | 0.43              | 6.36                                      | 42.9              | 0.95              | 3.88                                      | 21.5              | 0.9               | 27.5           |
